# Supplementary material for: Biological Valorization of Lignin-Derived Aromatics in Hydrolysate to Protocatechuic Acid by Engineered Pseudomonas putida KT2440
Source: MDPI journal article supplement (doi:10.3390/molecules29071555), 2024-03-30
Supplement: s1 [file s1]

## Supplementary Materials

### **Biological valorization of lignin-derived aromatics in hydrolysate to protocatechuic acid by engineered *Pseudomonas putida* KT2440**

Xinzhu Jin<sup>1</sup>, Xiaoxia Li<sup>1</sup>, Lihua Zou<sup>1</sup>, Zhaojuan Zheng<sup>1</sup>, Jia Ouyang<sup>1\*</sup>

<sup>1</sup>Jiangsu Co-Innovation Center of Efficient Processing and Utilization of Forest Resources, Nanjing Forestry University, Nanjing 210037, People's Republic of China;

Corresponding author: College of Chemical Engineering, Nanjing Forestry University,  
No. 159 Longpan Road, Nanjing 210037, People's Republic of China.

Tel/Fax: +86-02585427129.

E-mail address: [hgouyj@njfu.edu.cn](mailto:hgouyj@njfu.edu.cn) (J. Ouyang)

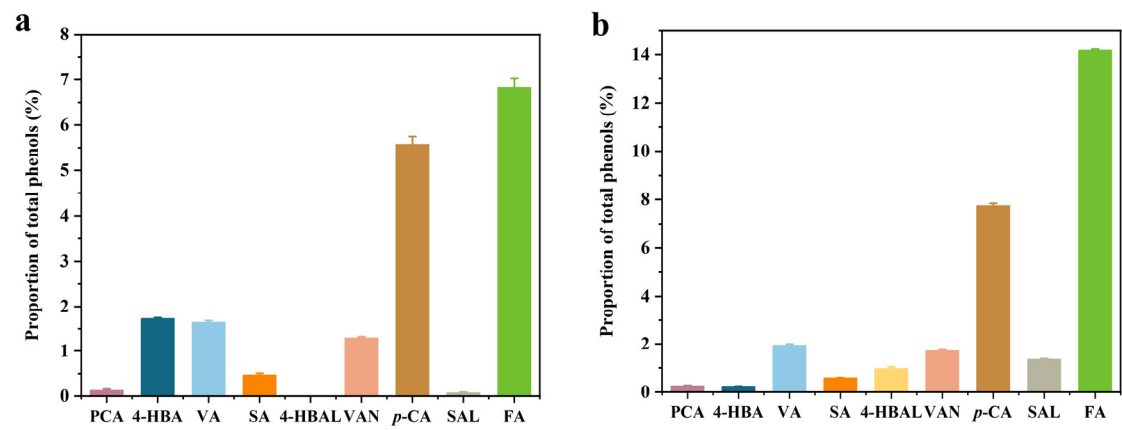

Fig. S1 Proportion of nine monophenols in total phenols in (a) hydrolysate 1 and (b) hydrolysate 2.

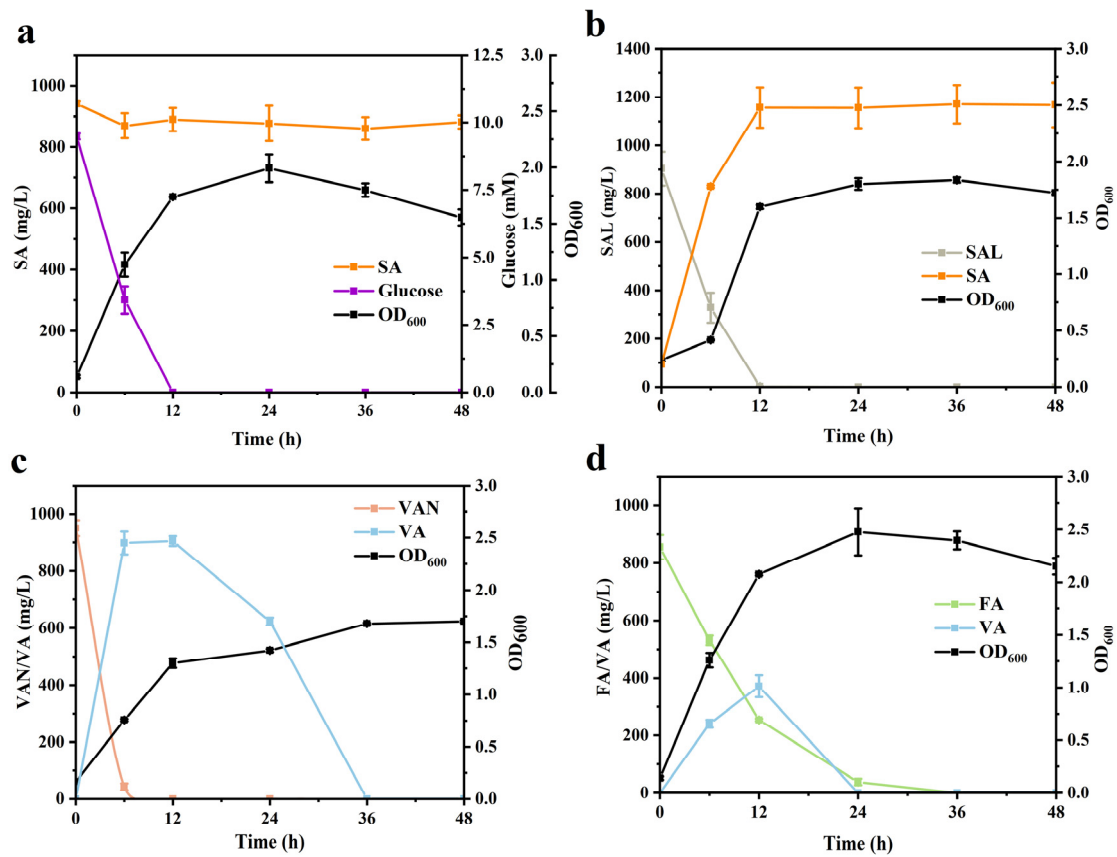

Fig. S2 Metabolic process and growth of (a) syringaldehyde, (b) syringic acid, (c) vanillin, (d) ferulic acid (1 g/L) by KT2440 in M9 minimal medium with 10 mM glucose ( $OD_{600}=0.2$ ).

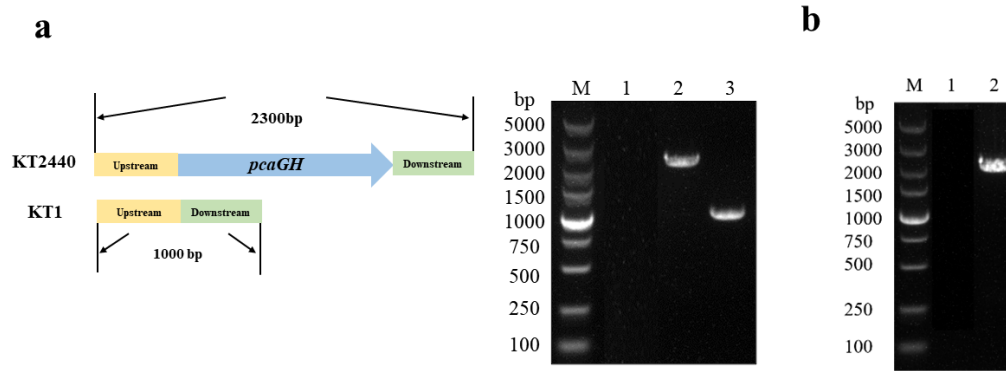

Fig. S3 (a) Confirmation of the deletion of the *pcaGH* gene in *P. putida* KT2440 genome, using colony PCR. The primers *pcaGH*-up-f and *pcaGH*-down-r were used for PCR. The positive clone exhibited a 1000 bp fragment that corresponded to the expected size of the deletion. M, 5 kb DNA ladder; 1, blank; 2, *P. putida* KT2440; 3, KT1. (b) Confirmation of the overexpression of the *vanAB* gene in KT1, using PCR after extraction of the plasmid, the correct 2031 bp fragment was shown. M, 5 kb DNA ladder; 1, blank; 2, KT2.

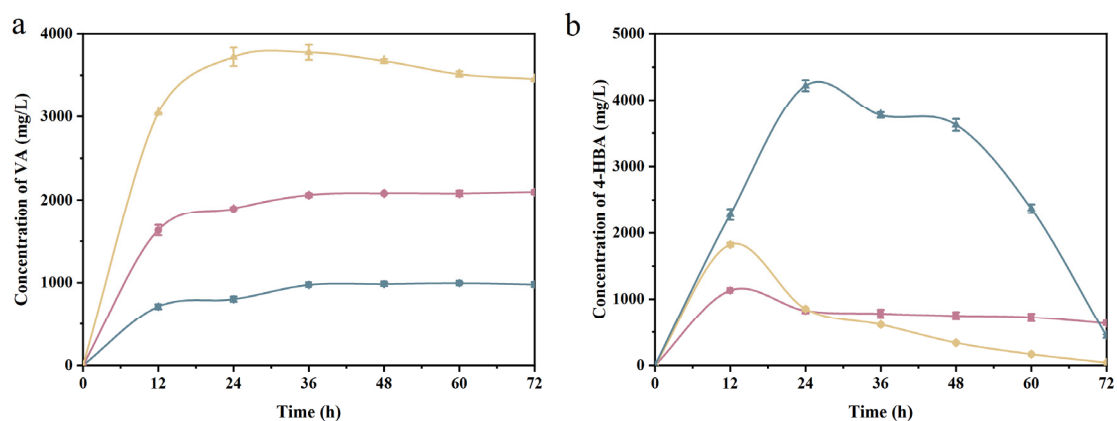

Fig. S4 (a) The intermediate 4-HBA concentration curves under different concentrations of *p*-CA. (b) The intermediate VA concentration curves under different concentrations of FA. The blue line corresponds to 10 g/L substrate concentration, the yellow line corresponds to 5 g/L, the pink line corresponds to 2 g/L, and the green line corresponds to 1 g/L.

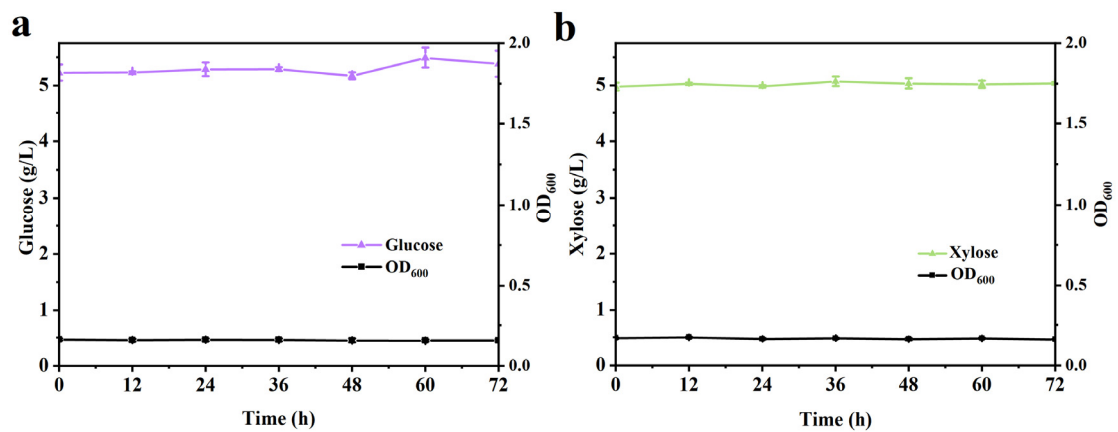

Fig. S5 Growth characterization of KT3 in M9 minimal medium with (a) 5 g/L glucose and (b) 5 g/L xylose.

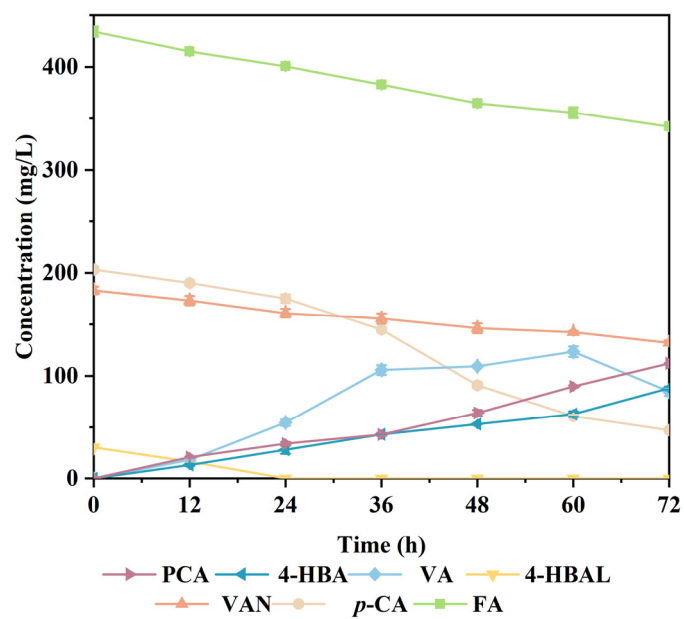

Fig. S6 Production of PCA from 80% (v/v) hydrolysate 2 by KT2

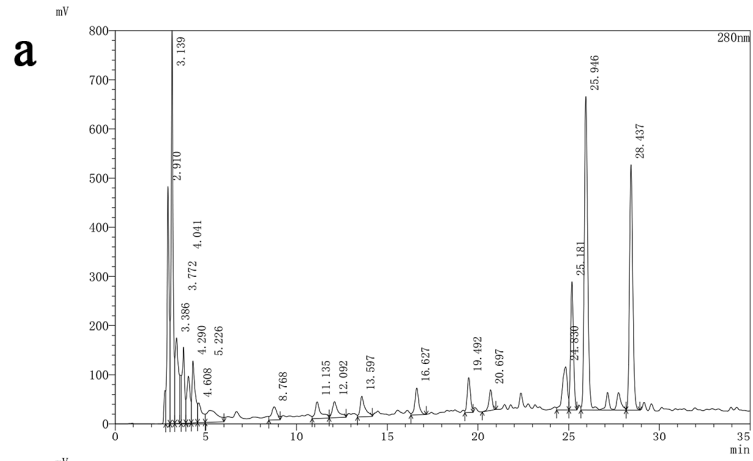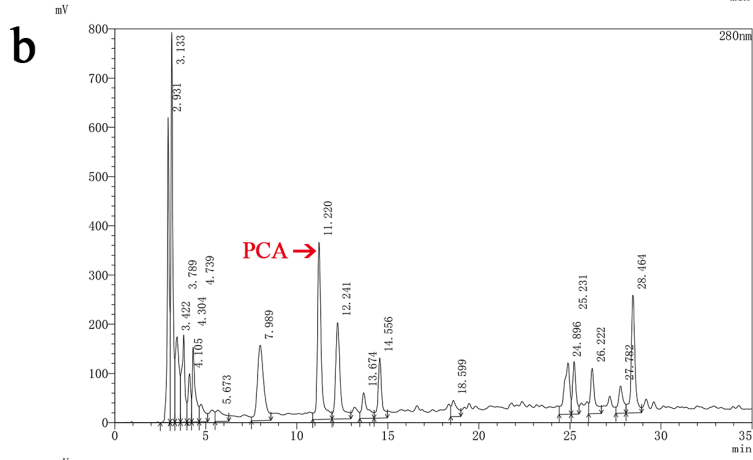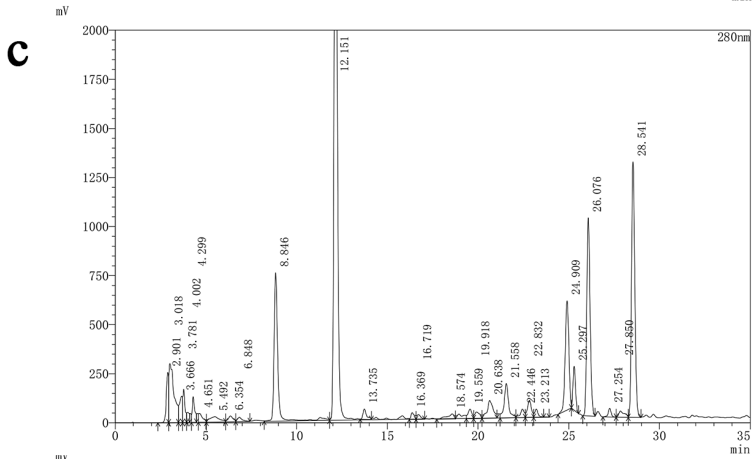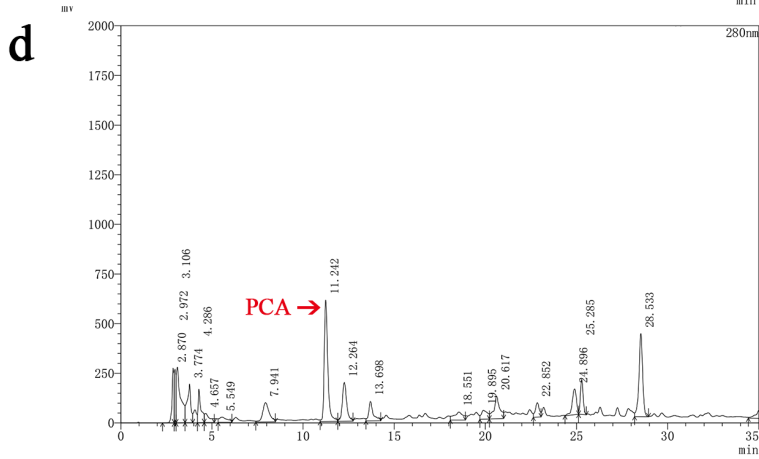



Fig. S7 HPLC analysis of PCA production from hydrolysates 1 and 2. (a) 0 h of hydrolysate 1, (b) 72 h of hydrolysate 1, (c) 0 h of hydrolysate 2, (d) 0 h of hydrolysate 2.

**Table S1** Primers used in this study, the restriction endonuclease sites are underlined.

| Primers              | Primer sequence 5'-3'                         |
|----------------------|-----------------------------------------------|
| <i>pcaGH</i> -up-f   | gaattcactgaatgaggtgcggccgttc ( <i>EcoR</i> I) |
| <i>pcaGH</i> -up-r   | cccttacgcctgactacaagacgcgaagtggatgggaagacg    |
| <i>pcaGH</i> -down-f | cgtcttcccatccacttcgcgtctttagtcaggcgtaaggg     |
| <i>pcaGH</i> -down-r | ggatccgcgcttgaccactgggggc ( <i>Bam</i> H I)   |
| <i>vanAB</i> -f      | attcacacaggaaacagctatgtacccccaaaacacctg       |
| <i>vanAB</i> -r      | gcgaattttaacaaaatattaacgctcagatgtccagcacca    |
| pBBR1MCS-2-f         | agctgttcctgtgtgaaat                           |
| pBBR1MCS-2-r         | gcgttaatatattgttaaaattcgc                     |
